# Supplementary material
Source: PubMed Central journal article supplement (PMC1224656)
Supplement: pnas_0506461102_1.pdf [file pnas_0506461102_1.pdf]

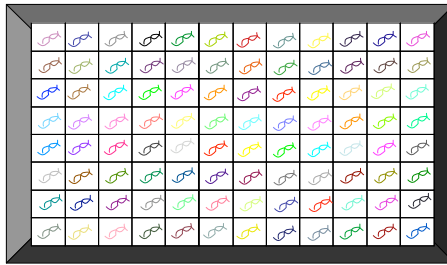

7216 dsRNA library  
organized in 76  
96-well plates

**1: RNA interference**

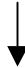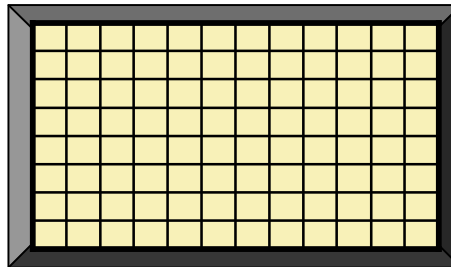

5 day incubation of S2  
cells with dsRNA library

**2: Infection**

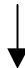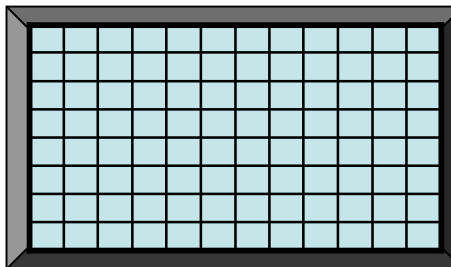

Infection of dsRNA treated  
S2 cells by *Listeria*  
*monocytogenes* strains  
for 7.5 hrs

**3: Immunofluorescence**

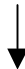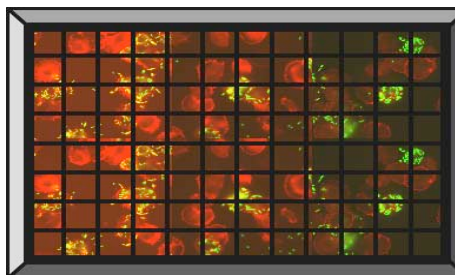

Immunofluorescence  
staining with  
**□-*Listeria* antibody**  
**Phalloidin-TRITC**
