# Supplementary material
Source: PubMed Central journal article supplement (PMC1224656)
Supplement: pnas_0506461102_2.pdf [file pnas_0506461102_2.pdf]

## Supporting table 2

Table 2. Genes identified from three independent RNAi screens with three strains of *L. monocytogenes*.

| <b>A. Fewer infected cells</b> |                |                                                                 |             |              |           |                                                                      |
|--------------------------------|----------------|-----------------------------------------------------------------|-------------|--------------|-----------|----------------------------------------------------------------------|
| CG n°                          | Gene name      | Function                                                        | Probability | H gene       | E value   | Human homologue                                                      |
| 1379                           | CG1379         | Transcription Factor                                            | *           | AML1/AMP19   | 2.00E-56  | Transcriptional Factor                                               |
| 1994                           | CG1994         | N-acetyltransferase                                             | ***         | FLJ10774     | 0         | N-acetyltransferase                                                  |
| 3403                           |                | (phoecin)                                                       | **          | PREI3        | 1.00E-104 | preimplantation protein 3                                            |
| 3605                           | CG3605         | Pre-mRNA splicing Factor                                        | *           | SF3B2        | 1.00E-151 | splicing factor 3b, subunit 2, 145kDa                                |
| 3848                           | Trr            | Trithorax-related (Transcription Factor)                        | ***         | MLL3         | 1.00E-167 | myeloid/lymphoid or mixed-lineage leukemia 3                         |
| 3911                           | CG3911         | (TRAPP)                                                         | ***         | BET3L        | 7.00E-41  | BAT3 like ( <i>S. cerevisiae</i> ) (TRAPP complex)                   |
| 3992                           | Srp            | Serpent (Transcriptional Activator)                             | ***         | GATA4        | 6.00E-19  | GATA binding protein 4                                               |
| 4185                           | NC2beta        | General transcriptional activity repressor                      | **          | DR1          | 8.00E-35  | down-regulator of transcription 1, TBP-binding (negative cofactor 2) |
| 4214                           | Syx5           | syntaxin 5A, t-SNARE activity                                   | *           | STX5A        | 5.00E-73  | syntaxin 5A                                                          |
| 4268                           | PitsIre        | Serine Threonine Kinase                                         | ***         | CDC2L1       | 1.00E-149 | cell division cycle 2-like 1                                         |
| 32743                          | Smg1           | Phosphatidyl 3 and 4 Kinase                                     | **          | SMG-1        | 1.00E-141 | PI-3-kinase-related kinase SMG-1                                     |
| 4921                           | Rab4           | Small GTPase                                                    | **          | RAB4A        | 1.00E-92  | RAB4A, member RAS oncogene family                                    |
| 4943                           | lack           | Ubiquitin-protein ligase activity                               | **          | SMURF1       | 1.00E-171 | SMAD specific E3 ubiquitin protein ligase 1                          |
| 4950                           | CG4950         | Receptor activity                                               | *           | LRRTM4       | 7.00E-17  | leucine rich repeat transmembrane neuronal 4                         |
| 5036                           | CG5036         | Regulator of G-protein signaling activity                       | **          | RGS20        | 1.00E-49  | regulator of G-protein signalling 20                                 |
| 5161                           | CG5161         | (TRAPP)                                                         | ***         | TRAPPC2      | 4.00E-42  | trafficking protein particle complex 2                               |
| 5837                           | Hem            | Receptor binding (Kette)                                        | **          | NCKAP1       | 0         | NCK-associated protein 1                                             |
| 33106                          | Mask           | Multiple ankyrin repeats single KH domain                       | ***         | ANKRD17      | 0         | ankyrin repeat domain 17                                             |
| 6292                           | CycT           |                                                                 | **          | CCNT2        | 8.00E-22  | Cyclin T2                                                            |
| 6510                           | RpL18a         | Structural constituent of ribosome                              | **          | RPL18A       | 5.00E-62  | ribosomal protein L18a                                               |
| 6523                           | CG6523         | Thiol-disulfide exchange intermediate activity                  | **          | TXNL2        | 3.00E-46  | thioredoxin-like 2                                                   |
| 6742                           | CenB1A         | Arf GTPase activator                                            | ***         | CENTB5       | 1.00E-130 | centaurin, beta 5                                                    |
| 6759                           | cdc16          | ubiquitin-protein ligase activity                               | *           | CDC16        | 7.00E-88  | CDC16 cell division cycle 16 homolog ( <i>S. cerevisiae</i> )        |
| 6905                           | CG6905         | pre-mRNA splicing factor                                        | *           | CDC5L        | 0         | CDC5 cell division cycle 5-like ( <i>S. pombe</i> )                  |
| 7380                           | CG7380         | DNA binding                                                     | *           | BANF1        | 1.00E-29  | barrier to autointegration factor 1                                  |
| 7392                           | Cka            | Connector of kinase to AP-1 (JNK cascade)                       | ****        | STRN3        | 0         | striatin, calmodulin binding protein 3                               |
| 7456                           | CG7456         |                                                                 | *           | COG4         | 1.00E-147 | component of oligomeric golgi complex 4                              |
| 8487                           | garz           | guanyl-nucleotide exchange factor activity ER-Golgi transport   | *           | GBF1         | 0         | golgi-specific brefeldin A resistance factor 1                       |
| 8610                           | cdc27          |                                                                 | **          | CDC27 (APC3) | 1.00E-113 | cell division cycle 27                                               |
| 8651                           | Trx            | Trithorax (Transcription Factor)                                | **          | MLL4         | 2.00E-86  | myeloid/lymphoid or mixed-lineage leukemia 4                         |
| 31756                          | CG31756 (or ?) |                                                                 | **          | KIAA1040     | 0         |                                                                      |
| 9298                           | CG9298         | (TRAPP)                                                         | ***         | TRAPPC4      | 6.00E-74  | trafficking protein particle complex 4 (TRAPP complex)               |
| 9712                           | TSG101         | Tumor suppressor protein 101, ubiquitin-protein ligase activity | *           | TSG101       | 2.00E-92  | tumor susceptibility gene 101                                        |
| 10153                          | CG10153        | (TRAPP)                                                         | ***         | TRAPPC5      | 6.00E-67  | trafficking protein particle complex 5 (TRAPP complex)               |
| 11098                          | CG11098        | "similar to C219 reactive peptide"                              | *           | CTAGE5       | 5.00E-07  | CTAGE family, member 5                                               |
| 11526                          | CG11526        | ?                                                               | ***         | FAM40A       | 0         |                                                                      |
| 15483                          | CG15483        | N-acetyllactosaminide beta-1,3-N-acetylglucosaminyltransferase  | *           | B3GNT6       | 4.00E-19  | UDP-GlcNAc:betaGal beta-1,3-N-acetylglucosaminyltransferase 6        |
| 16941                          | CG16941        | pre-mRNA splicing factor activity                               | *           | SF3A1        | 1.00E-130 | splicing factor 3a, subunit 1, 120kDa                                |
| 17839                          | CG17839        | DB, immunoglobulin subtype and fibronectin type III domains     | *           | TTN          | 3.00E-05  | titin                                                                |

  

| <b>B. Fewer infected cells, less vacuolar escape</b> |           |                                               |      |           |           |                                                                   |
|------------------------------------------------------|-----------|-----------------------------------------------|------|-----------|-----------|-------------------------------------------------------------------|
| 1088                                                 | Vha26     | Vacuolar H+ ATPase 26 Kda E subunit V1 domain | ***  | ATP6V1E1  | 9.00E-52  | ATPase, H+ transporting, lysosomal 31kDa, V1 subunit E isoform 1  |
| 1404                                                 | ran       | Small GTPase                                  | **   | RAN       | 1.00E-112 | RAN, member RAS oncogene family                                   |
| 1422                                                 | p115      | Protein transport activity                    | ***  | VDP       | 0         | vesicle docking protein p115                                      |
| 1515                                                 | I(1)G0155 | v-SNARE YKT6                                  | ***  | YKT6      | 7.00E-60  | SNARE protein Ykt6 (v-SNARE)                                      |
| 1528                                                 | gammaCOP  | COPI vesicle coat component                   | ***  | COPG2     | 0         | coatomer protein complex, subunit gamma 2                         |
| 3161                                                 | Vha16     | Vacuolar H+ ATPase 16 Kda V0 domain           | **** | ATP6V0C   | 8.00E-44  | ATPase, H+ transporting, lysosomal 16kDa, V0 subunit c            |
| 3320                                                 | Rab1      | Small GTPase                                  | *    | RAB1B     | 8.00E-92  | RAB1B, member RAS oncogene family                                 |
| 3664                                                 | Rab5      | Small GTPase                                  | ***  | RAB5C     | 1.00E-82  | RAB5C, member RAS oncogene family                                 |
| 3948                                                 | zetaCOP   | COPI vesicle coat component                   | ***  | COPZ1     | 7.00E-57  | coatomer protein complex, subunit zeta 1                          |
| 5650                                                 | Pp1-87B   | Protein phosphatase 1 at 87B                  | **** | PPP1CC    | 1.00E-173 | protein phosphatase 1, catalytic subunit, gamma isoform           |
| 5884                                                 | Par-6     | Structural molecule activity                  | *    | PAR6B     | 3.00E-69  | par-6 partitioning defective 6 homolog beta ( <i>C. elegans</i> ) |
| 6213                                                 | Vha13     | Vacuolar H+ ATPase 13 Kda G subunit V1 domain | **** | LOC473030 | 6.00E-06  | ATPase, H+ transporting, lysosomal 13kD, V1 subunit G             |
| 6223                                                 | betaCOP   | COPI vesicle coat component                   | ***  | COPB      | 0         | coatomer protein complex, subunit beta                            |

|       |              |                                                    |     |          |           |                                                                      |
|-------|--------------|----------------------------------------------------|-----|----------|-----------|----------------------------------------------------------------------|
| 7961  | alphaCOP     | COPI vesicle coat component                        | *** | COPA     | 0         | coatomer protein complex, subunit alpha                              |
| 8048  | Vha44        | Vacuolar H+ ATPase 44 Kda C                        | **  | ATP6V1C1 | 1.00E-140 | ATPase, H+ transporting, lysosomal 42kDa, V1 subunit C, isoform 1    |
| 9115  | Myotubularin | PI-3P and PI-3,5-biP Phosphatase                   | *** | MTMR2    | 0         | myotubularin related protein 2                                       |
| 12403 | Vha68-1      | ATPase A subunit V1 domain                         | **  | ATP6V1A  | 0         | ATPase, H+ transporting, lysosomal 70kDa, V1 subunit A               |
| 17332 | Vha SFD      | Vacuolar H+ SFD subunit V1 domain                  | *** | ATP6V1H  | 5.00E-163 | ATPase, H+ transporting, lysosomal 50/57kDa, V1 subunit H            |
| 17369 | Vha55        | Vacuolar H+ ATPase 55KDa B subunit V1 domain       | **  | ATP6V1B2 | 0         | ATPase, H+ transporting, lysosomal 56/58kDa, V1 subunit B, isoform 2 |
| 18627 | betaggtII    | Beta subunit of type II geranylgeranyl transferase | **  | RABGGTB  | 1.00E-119 | Rab geranylgeranyltransferase, beta subunit                          |

#### C. Fewer infected cells, less vacuolar escape, fewer bacteria per cell

|      |           |                                                    |      |               |           |                                                    |
|------|-----------|----------------------------------------------------|------|---------------|-----------|----------------------------------------------------|
| 3573 | EG:86E4.5 | Inositol-1,4,5-triphosphatase                      | **** | INPP5B        | 1.00E-107 | Inositol polyphosphate-5-phosphatase               |
| 4422 | Gdi       | GDP dissociation inhibitor                         | **** | GDI1 (or RAB) | 1.00E-177 | GDP dissociation inhibitor 1                       |
| 6842 | CG6842    | ATPase activity (VPS4)                             | ***  | VPS4A (SKD1)  | 1.00E-174 | vacuolar protein sorting 4A (yeast)                |
| 6939 | Sbf       | Diacylglycerol binding; Y/S/T phosphatase activity | ***  | SBF1          | 0         | SET binding factor 1                               |
| 8055 | CG8055    | SNF7 homologue, intracellular transport            | ***  | SNF7-2        | 8.00E-34  | Snf7 homologue associated with Alix1               |
| 8280 | Efalpa48D | Elongation factor 1alpha48D                        | *    | EEF1A1        | 0         | eukaryotic translation elongation factor 1 alpha 1 |
| 9575 | Rab35     | Small GTPase                                       | ***  | RAB35 (or Ra) | 3.00E-73  | RAB35, member RAS oncogene family                  |

#### D. Fewer infected cells, fewer bacteria per cell

|      |          |                              |     |              |           |                                                              |
|------|----------|------------------------------|-----|--------------|-----------|--------------------------------------------------------------|
| 4173 | septin 2 | Cell division/GTP binding    | *** | SEPT         | 1.00E-161 | Septin 11                                                    |
| 5164 | Gst1     | Glutathione S-transferase    | *   | GSTT2        | 5.00E-16  | glutathione S-transferase theta 2                            |
| 6509 | CG6509   | Structural molecule activity | *** | DLG5         | 6.00E-69  | discs, large homolog 5 (Drosophila)                          |
| 7436 | Nmt      | N-myristoyl transferase      | *   | NMT2         | 1.00E-156 | N-myristoyltransferase 2                                     |
| 7581 | Bub3     | RNA binding                  | **  | BUB3         | 1.00E-115 | BUB3 budding uninhibited by benzimidazoles 3 homolog (yeast) |
| 8705 | peanut   | Septin ring                  | **  | SEPT7 (CDC1) | 1.00E-133 | septin 7                                                     |
| 9012 | Chc      | Clathrin heavy chain         | **  | CLTCL1       | 0         | clathrin, heavy polypeptide-like 1                           |
| 9697 | CG9697   |                              | *** | PGLYRP4      | 8.00E-29  | peptidoglycan recognition protein 4                          |

#### E. Less vacuolar escape, fewer bacteria per cell

|       |           |                                 |    |           |           |                                                                            |
|-------|-----------|---------------------------------|----|-----------|-----------|----------------------------------------------------------------------------|
| 4303  | Bap60     | Brahma associated protein 60 kD | ** | SMARCD1   | 1.00E-163 | SWI/SNF related, matrix associated, actin dependent regulator of chromatin |
| 6375  | Pitchoune | RNA helicase                    | ** | DDX18     | 0         | DEAD (Asp-Glu-Ala-Asp) box polypeptide 18                                  |
| 17737 | CG17737   | Translation initiation factor   | *  | LOC441916 | 2.00E-35  | similar to Eukaryotic translation initiation factor 1 (eIF1)               |

#### F. Less vacuolar escape

|       |           |                                                                  |   |        |          |                                                                   |
|-------|-----------|------------------------------------------------------------------|---|--------|----------|-------------------------------------------------------------------|
| 4153  | eIF-2&bgr | eukaryotic initiation factor 2 & bgr (GTP binding, tRNA binding) | * | EIF2S2 | 8.00E-77 | eukaryotic translation initiation factor 2, subunit 2 beta, 38kDa |
| 4651  | RpL13     | structural constituent of ribosome                               | * | RPL13  | 3.00E-48 | ribosomal protein L13                                             |
| 31064 | CG31064   | Intracellular transport                                          | * | RIPX   | 1.00E-96 | rap2 interacting protein x                                        |

#### G. Fewer bacteria per cell

|       |      |                                 |   |           |           |                                                   |
|-------|------|---------------------------------|---|-----------|-----------|---------------------------------------------------|
| 4494  | Smt3 | ubiquitin-like protein          | * | LOC441512 | 7.00E-32  | similar to SMT3 suppressor of mif two 3 homolog 2 |
| 18028 | lt   | Light, ubiquitin-protein ligase | * | VPS41     | 1.00E-153 | vacuolar protein sorting 41 (yeast)               |

#### H. More bacteria per cell

|      |        |                                                         |     |         |          |                                                           |
|------|--------|---------------------------------------------------------|-----|---------|----------|-----------------------------------------------------------|
| 1395 | stg    | String, protein tyrosine /serine /threonine phosphatase | *** | CDC25C  | 6.00E-45 | cell division cycle 25C                                   |
| 4903 | MESR4  |                                                         | *** | ZNF585A | 5.00E-14 | Zinc finger protein 585A                                  |
| 5451 | CG5451 | WD40 repeats                                            | *** | SMU1    | 0        | smu-1 suppressor of mec-8 and unc-52 homolog (C. elegans) |
| 5505 | CG5505 | Ubiquitin specific protease activity                    | *** | USP36   | 1.00E-61 | ubiquitin specific protease 36                            |

#### I. Less infected cells or fewer bacteria per cell with LLO<sub>S44A</sub> producing strain specifically

| CG n° | Gene name | Function                                               | Probability | H gene   | E value   | Human homologue                                           |
|-------|-----------|--------------------------------------------------------|-------------|----------|-----------|-----------------------------------------------------------|
| 3329  | Prosbeta2 | Proteasome beta subunit 2                              | ***         | PSMB7    | 3.00E-93  | proteasome (prosome, macropain) subunit, beta type, 7     |
| 3416  | Mov34     | Proteasome subunit                                     | ***         | PSMD7    | 1.00E-132 | proteasome (prosome, macropain) 26S subunit non-ATPase, 7 |
| 3998  | zf30C     | Zinc finger protein 30C, transcription factor activity | ***         | FLJ14345 | 3.00E-34  | hypothetical protein FLJ14345                             |
| 4016  | Spt-I     | Serine palmitoyltransferase subunit I                  | ***         | SPTLC1   | 1.00E-127 | serine palmitoyltransferase, long chain base subunit 1    |
| 4162  | Lace      | Serine palmitoyltransferase subunit II                 | ***         | SPTLC2   | 1.00E-155 | serine palmitoyltransferase, long chain base subunit 2    |

|       |        |                           |    |         |          |                                                                       |
|-------|--------|---------------------------|----|---------|----------|-----------------------------------------------------------------------|
| 5802  | CG5802 | UDP-Galactose transporter | ** | SLC35B1 | 3.00E-72 | solute carrier family 35, member B1,UDP-galactose transporter related |
| 5873  | CG5873 | Peroxidase activity       | *  | D2S448  | 1.00E-89 | Melanoma associated gene                                              |
| 11139 | p47    |                           | ** | NSFL1C  | 4.00E-56 | NSFL1 (p97) cofactor (p47)                                            |

#### J. Escape of LLO strain

| CG n° | Gene name | Function                                                                            | Probability | H gene      | E value   | Human homologue                                               |
|-------|-----------|-------------------------------------------------------------------------------------|-------------|-------------|-----------|---------------------------------------------------------------|
| 2048  | dco       | casein kinase 1; serine/threonine protein kinase                                    | *           | CSNK1E      | 1.00E-156 | casein kinase 1 epsilon                                       |
| 2939  | slp2      | Transcription                                                                       | *           | FOXG1B      | 3.00E-38  | forkhead transcription factor slp2                            |
| 3093  | dor       | Ubiquitin-protein ligase activity, protein binding, Pep3/Vps18/deep orange          | ****        | VPS18       | 1.00E-149 | vacuolar protein sorting protein 18                           |
| 3269  | Rab2      | Small GTP binding protein, intracellular transport (ER to Golgi)                    | ****        | RAB2        | 1.00E-105 | small GTP binding protein RAB2A                               |
| 3299  | vinculin  | actin binding; structural constituent of cytoskeleton                               | **          | VCL         | 2.00E-94  | vinculin/alpha catenin                                        |
| 3473  | CG3473    | Ubiquitin-conjugating enzyme E2 N                                                   | **          | Ube2n       | 2.00E-66  | Ubiquitin-conjugating enzyme E2 N                             |
| 4173  | septin 2  | Cell division/GTP binding                                                           | *           | SEPT        | 1.00E-161 | Septin 11                                                     |
| 32743 | Smg1      | phosphatidyl 3 and 4 kinase                                                         | *           | SMG1        | 1.00E-141 | PI-3-kinase-related kinase SMG-1                              |
| 4943  | lack      | E3 ubiquitiny ligase SMURF,Rsp5p                                                    | **          | SMURF1      | 1.00E-171 | SMAD specific E3 ubiquitin protein ligase 1                   |
| 5923  |           | alpha DNA polymerase activity                                                       | *           | POLA2       | 5.00E-51  | polymerase (DNA directed), alpha 2 (70kD subunit)             |
| 31064 |           | endocytosis, intracellular transport                                                | */?         | RIPX        | 1.00E-96  | rap2 interacting protein x                                    |
| 6842  | CG6842    | ATP binding, intracellular protein transport                                        | ****        | VPS4        | 1.00E-171 | Vps4 (homologue vacuolar sorting)                             |
| 6946  |           | similarly to hnRNA                                                                  | ****        | HNRPF       | 4.00E-22  | heterogeneous nuclear ribonucleoprotein F                     |
| 7146  | CG7146    | intracellular protein transport- VAM6                                               | **          | VPS 39      | 1.00E-135 | Vps39/VAM6                                                    |
| 7169  | S1P       | Serine type endopeptidase; subtilisin activity involved in sterol regulatory elen   | ****        | MBTSP1      | 0         | membrane-bound transcription factor site-1 protease isoform 1 |
| 7555  | Nedd4     | ubiquitin-protein ligase activity, protein ubiquination                             | *           | NEDD4       | 0         | Ubiquitin ligase Nedd4h                                       |
| 7776  | E(Pc)     | establishment and/or maintenance of chromatin architecture                          | **          | EPC1        | 4.00E-92  | enhancer of polycomb homolog 1                                |
| 8055  | CG8055    | SNF7 homologue, intracellular transport                                             | ****        | SNF7-2      | 8.00E-34  | Snf7 homologue associated with Alix1                          |
| 8454  | CG8454    | intracellular protein transport; lysosomal transport, Vps16                         | ****        | VPS16       | 1.00E-148 | vacuolar protein sorting protein 16, isoform 1                |
| 8705  | peanut    | Septin ring                                                                         | *           | SEPT7 (CDC1 | 1.00E-133 | septin 7                                                      |
| 8882  | Trip1     | Translation initiation factor activity                                              | *           | EIF3S2      | 1.00E-116 | eukaryotic translation initiation factor 3, subunit 2 beta    |
| 8952  | CG8952    | serine type endopeptidase; proteolysis and peptidolysis                             | *           | TMPRSS3     | 7.00E-28  | transmembrane protease, serine 3                              |
| 9012  | chc       | clathrin heavy chain, intracellular transport, clathrin coat of coated pit          | *           | CLTCL1      | 0         | clathrin, heavy polypeptide-like 1                            |
| 9177  | elF5      | translation initiation factor activity, eukaryotic translation initiation factor 5' | **          | EIF5        | 1.00E-113 | eukaryotic translation initiation factor 5                    |
| 9086  | CG9086    | ubiquitin protein ligase activity                                                   | **          | UBR1        | 0         | ubiquitin protein ligase E3 component n-recognin 1            |
| 9311  | CG9311    | protein tyrosine phosphatase activity; BRO1 protein/Vps 31; G-protein coupled       | ****        | PTPN23      | 1.00E-134 | protein tyrosine phosphatase, non-receptor type 23            |
| 9712  | TSG101    | tumor suppressor gene 101                                                           | *           | TSG101      | 1.00E-97  | tumor susceptibility gene 101                                 |
| 12230 | car       | SNARE binding; Vps33; sec1 like domain                                              | ****        | VPS33A      | 1.00E-116 | vacuolar protein sorting 33A                                  |
| 18028 | lt        | Light, ubiquitin-protein ligase                                                     | **          | VPS41       | 1.00E-153 | vacuolar protein sorting 41 (yeast)                           |

Genes were organized according to phenotypes as observed by immunofluorescence microscopy.

The "probability" of the phenotype was scored as strength of the manifested phenotype in the corresponding category with four stars (\*\*\*\*) indicating a very strong mutant phenotype and one star (\*) indicating a mild phenotype. Gene function was as described in Flybase or by gene homologies. The genes were compared with the *Homo sapiens* gene database by BLAST analysis to determine E values and human gene homology. Phenotype groups A to H were observed in at least the wild type and LLO<sub>S44A</sub> producing mutant screens. Phenotype group I was more prominent in the LLO<sub>S44A</sub> producing mutant screen. Phenotype group J was specific for the LLO-minus screen.
